# Supplementary material for: Does Cognitive Training Reduce Falls across Ten Years?: Data from the ACTIVE Trial
Source: MDPI journal article supplement (doi:10.3390/ijerph20064941), 2023-03-11
Supplement: s1 [file s1]

## SUPPLEMENTARY MATERIALS

Supplementary Table S1. Reported falls per follow-up assessment, *n* (%).

|           | Full Sample          | Control            | Speed of<br>Processing | Memory             | Reasoning          |
|-----------|----------------------|--------------------|------------------------|--------------------|--------------------|
| Annual 1  | 317/2280<br>(13.90%) | 82/571<br>(14.36%) | 72/584<br>(12.33%)     | 73/572<br>(12.76%) | 90/553<br>(16.27%) |
| Annual 2  | 316/2192<br>(14.42%) | 78/539<br>(14.47%) | 73/556<br>(13.13%)     | 78/556<br>(14.03%) | 87/541<br>(16.08%) |
| Annual 3  | 281/2075<br>(13.54%) | 72/505<br>(14.26%) | 68/531<br>(12.81%)     | 71/528<br>(13.45%) | 70/511<br>(13.70%) |
| Annual 5  | 290/1855<br>(15.63)  | 75/447<br>(16.78%) | 78/479<br>(16.28%)     | 71/463<br>(15.33%) | 66/466<br>(14.16%) |
| Annual 10 | 237/1212<br>(19.55)  | 58/284<br>(20.42%) | 61/317<br>(19.24%)     | 49/297<br>(16.50%) | 69/314<br>(21.97%) |

*Note.* Reported falls include participants who reported more than one fall across the intervention period. For example, if a participant in the control group experienced a fall at Annual 1 and again at Annual 5, they would contribute to both cells. Omnibus ( $\chi^2$ ) tests indicated no group differences at any assessment.
